# Supplementary material for: Construction of multifunctional carboxymethyl cellulose nanohydrogel carriers based on near-infrared DNA-templated quantum dots for tumor theranostics
Source: Royal Society of Chemistry journal article supplement (doi:10.1039/d2ra05424h), 2022-01-01
Supplement: d2ra05424h1.pdf [file d2ra05424h1.pdf]

## Supplementary Material

# Construction of multifunctional carboxymethyl cellulose nanohydrogel carriers based on near-infrared DNA-templated quantum dots for tumor theragnostics

Yuezheng,<sup>\*a</sup> Shengquan He,<sup>b</sup> Penghui Jin,<sup>b</sup> Yabiao Gao,<sup>b</sup> Ya Di,<sup>a</sup> Liming Gao,<sup>a</sup> and  
Jidong Wang<sup>\*b</sup>

*a.The First Hospital in Qinhuangdao Affiliated to Hebei Medical University, Qinhuangdao, China*

*b.Hebei Key Laboratory of Applied Chemistry, Nano-biotechnology Key Lab of Hebei Province, School of*

*Environmental and Chemical Engineering, Yanshan University, Qinhuangdao, China.*

\*corresponding author:

Yue Zheng Email: [yuezheng1965@sina.com](mailto:yuezheng1965@sina.com)

Jidong Wang Email: [wangjidong@ysu.edu.cn](mailto:wangjidong@ysu.edu.cn)

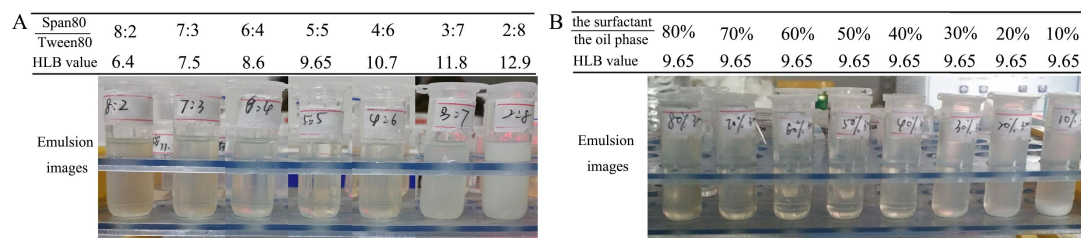

**Figure S1 (A)** Emulsification effects and images in different HLB values **(B)** effects and images of the amount of surfactant

**Table S1** The effect of different demulsifying agents

|                | 1 mL                               | 2 mL                                         | 3 mL                                                       | 4 mL                                                       | 5 mL                                                                 |
|----------------|------------------------------------|----------------------------------------------|------------------------------------------------------------|------------------------------------------------------------|----------------------------------------------------------------------|
| <b>Acetone</b> | Clarify                            | Slightly turbid, with a little precipitation | Cloudy, with a large amount of precipitation at the bottom | Cloudy, with a large amount of precipitation at the bottom | Upper layer clear, and a large amount of precipitation at the bottom |
| <b>Ethanol</b> | Turbid with a little precipitation | Very turbid, with a little precipitation     | Clarify                                                    | Clarify                                                    | Clarify                                                              |
